# Supplementary material for: Sunvozertinib, a Selective EGFR Inhibitor for Previously Treated Non–Small Cell Lung Cancer with EGFR Exon 20 Insertion Mutations
Source: PubMed Central journal article supplement — Cancer Discov. 2022 Apr 11;12(7):1676–89. doi: 10.1158/2159-8290.CD-21-1615 (PMC9262839; doi:10.1158/2159-8290.cd-21-1615), 2022-04-11
Supplement: NIHMS1799062-supplement-2.pdf [file NIHMS1799062-supplement-2.pdf]

## Supplementary Materials

### Supplementary Table S1. A brief SAR summary for the discovery of sunvozertinib

| 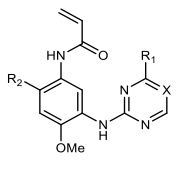 | R <sub>2</sub> =                                                                    | R <sub>1</sub> =                                                                    | X = | pEGFR IC <sub>50</sub> (nM) |       |     |           | Selected in vitro DMPK             |                                                     |                                       |
|-----------------------------------------------------------------------------------|-------------------------------------------------------------------------------------|-------------------------------------------------------------------------------------|-----|-----------------------------|-------|-----|-----------|------------------------------------|-----------------------------------------------------|---------------------------------------|
|                                                                                   |                                                                                     |                                                                                     |     | H1975                       | Ba/F3 |     | A431      | Kinetic solubility @ pH = 7.4 (μM) | Human Heps Clint [(μL/min)/(10 <sup>6</sup> cells)] | Human plasma protein binding (% free) |
|                                                                                   |                                                                                     |                                                                                     |     | L858R/T790M                 | ASV   | NPH | Wild-type |                                    |                                                     |                                       |
| AZD9291 (osimertinib)                                                             |    |    | CH  | 1.9                         | 128   | 165 | 230       | 7.0*                               | 3.9*                                                | 3.4*                                  |
| Cpd-1                                                                             |    |    | N   | 3.9                         | 38    | 54  | 17        | -                                  | -                                                   | -                                     |
| Cpd-2                                                                             |    |    | N   | 13                          | 130   | 97  | 75        | -                                  | -                                                   | -                                     |
| Cpd-3                                                                             |   |   | N   | 0.61                        | 16    | 64  | 46        | -                                  | <1                                                  | 71.1                                  |
| Cpd-4                                                                             |  |  | N   | 2.0                         | -     | 8.9 | 3.9       | 1.9                                | 27.7                                                | 14.8                                  |
| Cpd-5                                                                             |  |  | N   | 0.32                        | 6.8   | 15  | 6.3       | 90                                 | 34                                                  | 33.6                                  |
| Cpd-6                                                                             |  |  | N   | 0.3                         | 6.9   | 9.7 | 7.6       | 869                                | 7.1                                                 | 22.9                                  |
| Cpd-7                                                                             |  |  | CH  | 0.9                         | 12    | 14  | 14        | >1000                              | 10.3                                                | 13.3                                  |
| Cpd-8                                                                             |  |  | N   | 0.6                         | 6.9   | 14  | 12        | 471                                | 2.8                                                 | 19.6                                  |
| Cpd-9 (Enantiomer of DZD9008)                                                     |  |  | CH  | 1.0                         | 52    | 51  | 362       | 862                                | <1                                                  | 11.1                                  |
| DZD9008 (Sunvozertinib)                                                           |  |  | CH  | 1.1                         | 20    | 20  | 80        | 616                                | 3.3                                                 | 8.5                                   |

\*Data from Finlay et al (21)

**Supplementary Table S2.** Summary of nonclinical DMPK properties of sunvozertinib

| Parameters                                                                 | Values                                                                                                     |
|----------------------------------------------------------------------------|------------------------------------------------------------------------------------------------------------|
| Intrinsic permeability in Caco2 cell pH6.5/7.4                             | $15.2 \times 10^{-6}$ cm/s (apical to basolateral)                                                         |
| Rat PK: IV route, Dose, CL, $V_{ss}$ , $t_{1/2}$ ,<br>Oral route, Dose, %F | 3 mg/kg, 30.8 mL/min/kg, 13.6 L/kg, 6.37 hr<br>3 mg/kg, 39.6%                                              |
| Dog PK: IV route, Dose, CL, $V_{ss}$ , $t_{1/2}$ ,<br>Oral route, Dose, %F | 1 mg/kg, 30.9 mL/min/kg, 29.5 L/kg, 13.9 hr<br>1 mg/kg, 48.8%                                              |
| CYP reversible inhibition ( $IC_{50}$ , nM)                                | > 30 $\mu$ M (CYPs 1A2, 2A6, 2B6, 2C8, 2C9, 2C19, and<br>2E1), 6.3 $\mu$ M (CYP2D6), 18.2 $\mu$ M (CYP3A4) |
| Time dependent inhibition (%inhibition at 10 $\mu$ M)                      | < 20% (CYPs 1A2, 2C9, 2C19, and 2D6), 24.3%<br>(CYP3A4)                                                    |

**Supplementary Table S3. Kinase panel screening at single-concentration of 1  $\mu$ M sunvozertinib**

| Kinase (Human)      | % Kinase Activity Inhibition | Kinase (Human)     | % Kinase Activity Inhibition | Kinase (Human)                   | % Kinase Activity Inhibition |
|---------------------|------------------------------|--------------------|------------------------------|----------------------------------|------------------------------|
| EGFR (T790M, L858R) | 99                           | CK1 $\gamma$ 1     | 15                           | MARK1                            | 4                            |
| BTK                 | 96                           | ROCK2              | 15                           | PI3 Kinase (p110d/p85 $\alpha$ ) | 4                            |
| BLK                 | 90                           | CDK7/cyclinH/MAT1  | 14                           | FGFR1                            | 3                            |
| ErbB4               | 88                           | Syk                | 14                           | CaMKI                            | 2                            |
| ALK                 | 86                           | Fms                | 13                           | cKit                             | 2                            |
| BMX                 | 80                           | PKC $\alpha$       | 13                           | FGFR4                            | 2                            |
| EGFR                | 76                           | AMPK $\alpha$ 2    | 12                           | JAK2                             | 2                            |
| FAK                 | 74                           | SGK                | 12                           | PKC $\epsilon$                   | 2                            |
| ErbB2               | 73                           | DMPK               | 11                           | SRPK1                            | 2                            |
| Mnk2                | 67                           | eEF-2K             | 11                           | DDR2                             | 1                            |
| Fes                 | 65                           | IRAK1              | 11                           | DRAK1                            | 1                            |
| BRK                 | 63                           | PI3 Kinase (p120g) | 11                           | FGFR1(V561M)                     | 1                            |
| Ros                 | 51                           | Plk1               | 11                           | Ret                              | 1                            |
| TrkA                | 51                           | Aurora-B           | 10                           | TBK1                             | 1                            |
| Yes                 | 51                           | CDK9/cyclin T1     | 10                           | FLT1                             | 0                            |
| TNIK                | 47                           | c-RAF              | 10                           | GSK3 $\alpha$                    | 0                            |
| Lyn                 | 44                           | FGFR2              | 10                           | PI3 Kinase (p110a/p85 $\alpha$ ) | 0                            |
| TGFBR1              | 42                           | MAPK1              | 10                           | ROCK1                            | 0                            |
| LCK                 | 37                           | CaMKII             | 9                            | DNA-PK                           | -1                           |
| IGF-1R              | 35                           | CHK1               | 9                            | PI3 Kinase (p110b/p85 $\alpha$ ) | -1                           |
| MLK1                | 33                           | GSK3 $\beta$       | 9                            | PDGFR $\beta$                    | -2                           |
| MET                 | 30                           | Rsk1               | 9                            | PDK1                             | -2                           |
| MSK1                | 26                           | Fer                | 8                            | PI3KC2 $\alpha$                  | -2                           |
| EphB1               | 24                           | Ret (V804L)        | 8                            | ULK2                             | -2                           |
| IRAK4               | 24                           | Ron                | 8                            | JNK1 $\alpha$ 1                  | -3                           |
| JAK3                | 24                           | EphB4              | 7                            | MINK                             | -3                           |
| Fyn                 | 23                           | PKA                | 7                            | p70S6K                           | -3                           |
| MEK1                | 21                           | ABL                | 6                            | PI3KC2g                          | -3                           |
| TAK1                | 21                           | Aurora-C           | 6                            | IKK $\beta$                      | -5                           |
| PRAK                | 19                           | JAK1               | 6                            | PKB $\alpha$                     | -5                           |
| ABL(T315I)          | 18                           | mTOR               | 6                            | AMPK $\alpha$ 1                  | -6                           |
| ARG                 | 18                           | Lck, activated     | 5                            | CK2 $\alpha$ 2                   | -6                           |
| cSRC                | 18                           | NEK2               | 5                            | Ret(V804M)                       | -6                           |
| ARK5                | 17                           | PAK2               | 5                            | PRKG2                            | -8                           |
| EphA5               | 17                           | PAK4               | 5                            | MLCK                             | -9                           |
| PKC $\theta$        | 17                           | Rse                | 5                            | PAK1                             | -9                           |
| AXL                 | 16                           | b-RAF              | 4                            | PKB $\beta$                      | -10                          |
| FLT3                | 16                           | FGFR3              | 4                            | CDK1/cyclinB                     | -13                          |
| Pim-2               | 16                           | MAPKAP-K2          | 4                            | CDK2/cyclinA                     | -13                          |

**Supplementary Table S4.** *In vitro* inhibitory activity (IC<sub>50</sub>s, nM) of sunvozertinib against 15 kinases which were inhibited > 50% at 1 uM of sunvozertinib

| <b>Kinase (Human)</b> | <b>IC<sub>50</sub></b> |
|-----------------------|------------------------|
| EGFR (T790M, L858R)   | 13                     |
| BTK                   | 213                    |
| EGFR                  | 226                    |
| FAK                   | 255                    |
| ErbB2                 | 392                    |
| BRK                   | 529                    |
| ErbB4                 | 704                    |
| Ros                   | 937                    |
| Mnk2                  | 1032                   |
| BLK                   | 1036                   |
| ALK                   | 1172                   |
| Fes                   | 1764                   |
| BMX                   | 2289                   |
| Yes                   | 2895                   |
| TrkA                  | >10,000                |

**Supplementary Table S5. Common (> 10%) TEAEs by MedDRA preferred term**

| <b>MedDRA Preferred Term</b>           | <b>50 mg<br/>(n = 6)<br/>n (%)</b> | <b>100 mg<br/>(n = 9)<br/>n (%)</b> | <b>200 mg<br/>(n = 16)<br/>n (%)</b> | <b>300 mg<br/>(n = 51)<br/>n (%)</b> | <b>400 mg<br/>(n = 20)<br/>n (%)</b> | <b>All<br/>(n = 102)<br/>n (%)</b> |
|----------------------------------------|------------------------------------|-------------------------------------|--------------------------------------|--------------------------------------|--------------------------------------|------------------------------------|
| Diarrhoea                              | 1 (16.7)                           | 1 (11.1)                            | 10 (62.5)                            | 29 (56.9)                            | 17 (85.0)                            | 58 (56.9)                          |
| Rash                                   | 3 (50.0)                           | 2 (22.2)                            | 3 (18.8)                             | 23 (45.1)                            | 14 (70.0)                            | 45 (44.1)                          |
| Anaemia                                | 2 (33.3)                           | 3 (33.3)                            | 4 (25.0)                             | 16 (31.4)                            | 11 (55.0)                            | 36 (35.3)                          |
| Nausea                                 | 1 (16.7)                           | 3 (33.3)                            | 3 (18.8)                             | 19 (37.3)                            | 8 (40.0)                             | 34 (33.3)                          |
| Vomiting                               | 1 (16.7)                           | 2 (22.2)                            | 3 (18.8)                             | 13 (25.5)                            | 13 (65.0)                            | 32 (31.4)                          |
| Decreased appetite                     | 1 (16.7)                           | 3 (33.3)                            | 2 (12.5)                             | 17 (33.3)                            | 9 (45.0)                             | 32 (31.4)                          |
| Paronychia                             | 1 (16.7)                           | 1 (11.1)                            | 4 (25.0)                             | 15 (29.4)                            | 8 (40.0)                             | 29 (28.4)                          |
| Blood creatine phosphokinase increased | 0 (0.0)                            | 2 (22.2)                            | 3 (18.8)                             | 9 (17.6)                             | 12 (60.0)                            | 26 (25.5)                          |
| Fatigue                                | 2 (33.3)                           | 1 (11.1)                            | 1 (6.3)                              | 11 (21.6)                            | 7 (35.0)                             | 22 (21.6)                          |
| Blood creatinine increased             | 0 (0.0)                            | 1 (11.1)                            | 1 (6.3)                              | 9 (17.6)                             | 8 (40.0)                             | 19 (18.6)                          |
| Mouth ulceration                       | 0 (0.0)                            | 1 (11.1)                            | 2 (12.5)                             | 11 (21.6)                            | 4 (20.0)                             | 18 (17.6)                          |
| Weight decreased                       | 0 (0.0)                            | 3 (33.3)                            | 0 (0.0)                              | 6 (11.8)                             | 6 (30.0)                             | 15 (14.7)                          |
| Amylase increased                      | 0 (0.0)                            | 2 (22.2)                            | 2 (12.5)                             | 8 (15.7)                             | 2 (10.0)                             | 14 (13.7)                          |
| Lipase increased                       | 0 (0.0)                            | 0 (0.0)                             | 1 (6.3)                              | 8 (15.7)                             | 4 (20.0)                             | 13 (12.7)                          |
| Hypokalaemia                           | 0 (0.0)                            | 1 (11.1)                            | 0 (0.0)                              | 5 (9.8)                              | 7 (35.0)                             | 13 (12.7)                          |
| Aspartate aminotransferase increased   | 1 (16.7)                           | 1 (11.1)                            | 1 (6.3)                              | 5 (9.8)                              | 4 (20.0)                             | 12 (11.8)                          |
| Dizziness                              | 0 (0.0)                            | 2 (22.2)                            | 1 (6.3)                              | 5 (9.8)                              | 4 (20.0)                             | 12 (11.8)                          |
| Pneumonia                              | 0 (0.0)                            | 1 (11.1)                            | 1 (6.3)                              | 5 (9.8)                              | 4 (20.0)                             | 11 (10.8)                          |

Pooled analysis of WU-KONG1 and WU-KONG2 studies. Data cut-off date: 3 April 2021. TEAE: treatment emergent adverse event. MedDRA: Medical Dictionary for Regulatory Activities.

**Supplementary Table S6.** Summary of multiple-dose sunvozertinib pharmacokinetic parameters geometric mean [%CV] after daily administration on day 1 of Cycle 2.

|                                  | 50 mg<br>N = 5 | 100 mg<br>N = 7 | 200 mg<br>N = 9 | 300 mg<br>N = 11 | 400 mg<br>N = 10 |
|----------------------------------|----------------|-----------------|-----------------|------------------|------------------|
| AUC <sub>tau</sub><br>(hr*ng/mL) | 1271 [32.73]   | 4371 [51.80]    | 6817 [50.57]    | 9131 [50.82]     | 16730 [47.69]    |
| C <sub>ss,max</sub><br>(ng/mL)   | 68.42 [36.93]  | 252.1 [46.65]   | 402.3 [50.27]   | 521.4 [48.38]    | 976.2 [52.27]    |

Data are preliminary, unvalidated and subject to change. AUC<sub>tau</sub>, area under the concentration-time curve within dosing interval; C<sub>max</sub>, maximum plasma concentration.

**Supplementary Table S7. Antitumor activity of sunvozertinib in EGFR exon20ins subtypes**

| Mutation subtypes        | ORR*, n (%) | DCR, n (%) |
|--------------------------|-------------|------------|
| V769_D770insASV (N = 20) | 8 (40.0)    | 19 (90.0)  |
| D770_N771insSVD (N = 10) | 6 (60.0)    | 9 (90.0)   |
| Other subtypes# (N = 18) | 7 (38.9)    | 15 (83.3)  |
| Unknown subtypes (N = 5) | 0 (0.0)     | 4 (80.0)   |
| All (N = 53)             | 21 (39.6)   | 46 (86.8)  |

Pooled analysis of WU-KONG1 and WU-KOKNG2 studies at dose levels  $\geq 100$  mg. Data cut-off date: 3 April 2021. ORR: objective response rate; DCR: disease control rate. \*: Confirmed ORR; #: Other subtypes of EGFR exon20ins include: V774\_C775insHV, D770delinsDV, V769\_D770insASV, H773\_V774insH, H773\_V774insAH, D770\_N771insG, H773\_V774insPHPH and N771\_P772insSVDN.

**Supplementary Table S8. Antitumor activity of sunvozertinib in EGFR or HER2 mutations beyond EGFR exon20ins in the phase 1 study**

| Mutation Types                  | Number of PR (n) | Number of SD (n) |
|---------------------------------|------------------|------------------|
| EGFR sensitizing mutation (n=4) | 1                | 2                |
| EGFR double mutation (n=6)      | 1                | 3                |
| HER2 exon20ins (n=26)           | 3                | 7                |
| EGFR uncommon mutation (n=1)    | 0                | 1                |

Note:

EGFR sensitizing mutation includes L858R and 19del. EGFR double mutation include L858R/T790M or 19del/T790M.

In 4 patients with EGFR sensitizing mutation who received median 5 lines of prior systemic therapy, including 100% post EGFR TKI treatment, 1 showed PR.

In 6 patients with EGFR sensitizing /T790M double mutation who received median 3 lines of prior systemic therapy, including 100% post EGFR TKI treatment, 1 showed PR (50 mg, post icotinib treatment, but not osimertinib).

In 26 patients with HER2 Exon20ins who received median 3 lines of prior systemic therapy including 3 received HER2 targeted therapy, 3 showed PR (2 cases, 300 mg; 1 case, 400 mg) with 1 confirmed.
