# Supplementary material for: Sunvozertinib, a Selective EGFR Inhibitor for Previously Treated Non–Small Cell Lung Cancer with EGFR Exon 20 Insertion Mutations
Source: PubMed Central journal article supplement — Cancer Discov. 2022 Apr 11;12(7):1676–89. doi: 10.1158/2159-8290.CD-21-1615 (PMC9262839; doi:10.1158/2159-8290.cd-21-1615), 2022-04-11
Supplement: NIHMS1799062-supplement-3.pdf [file NIHMS1799062-supplement-3.pdf]

## Supplementary Materials

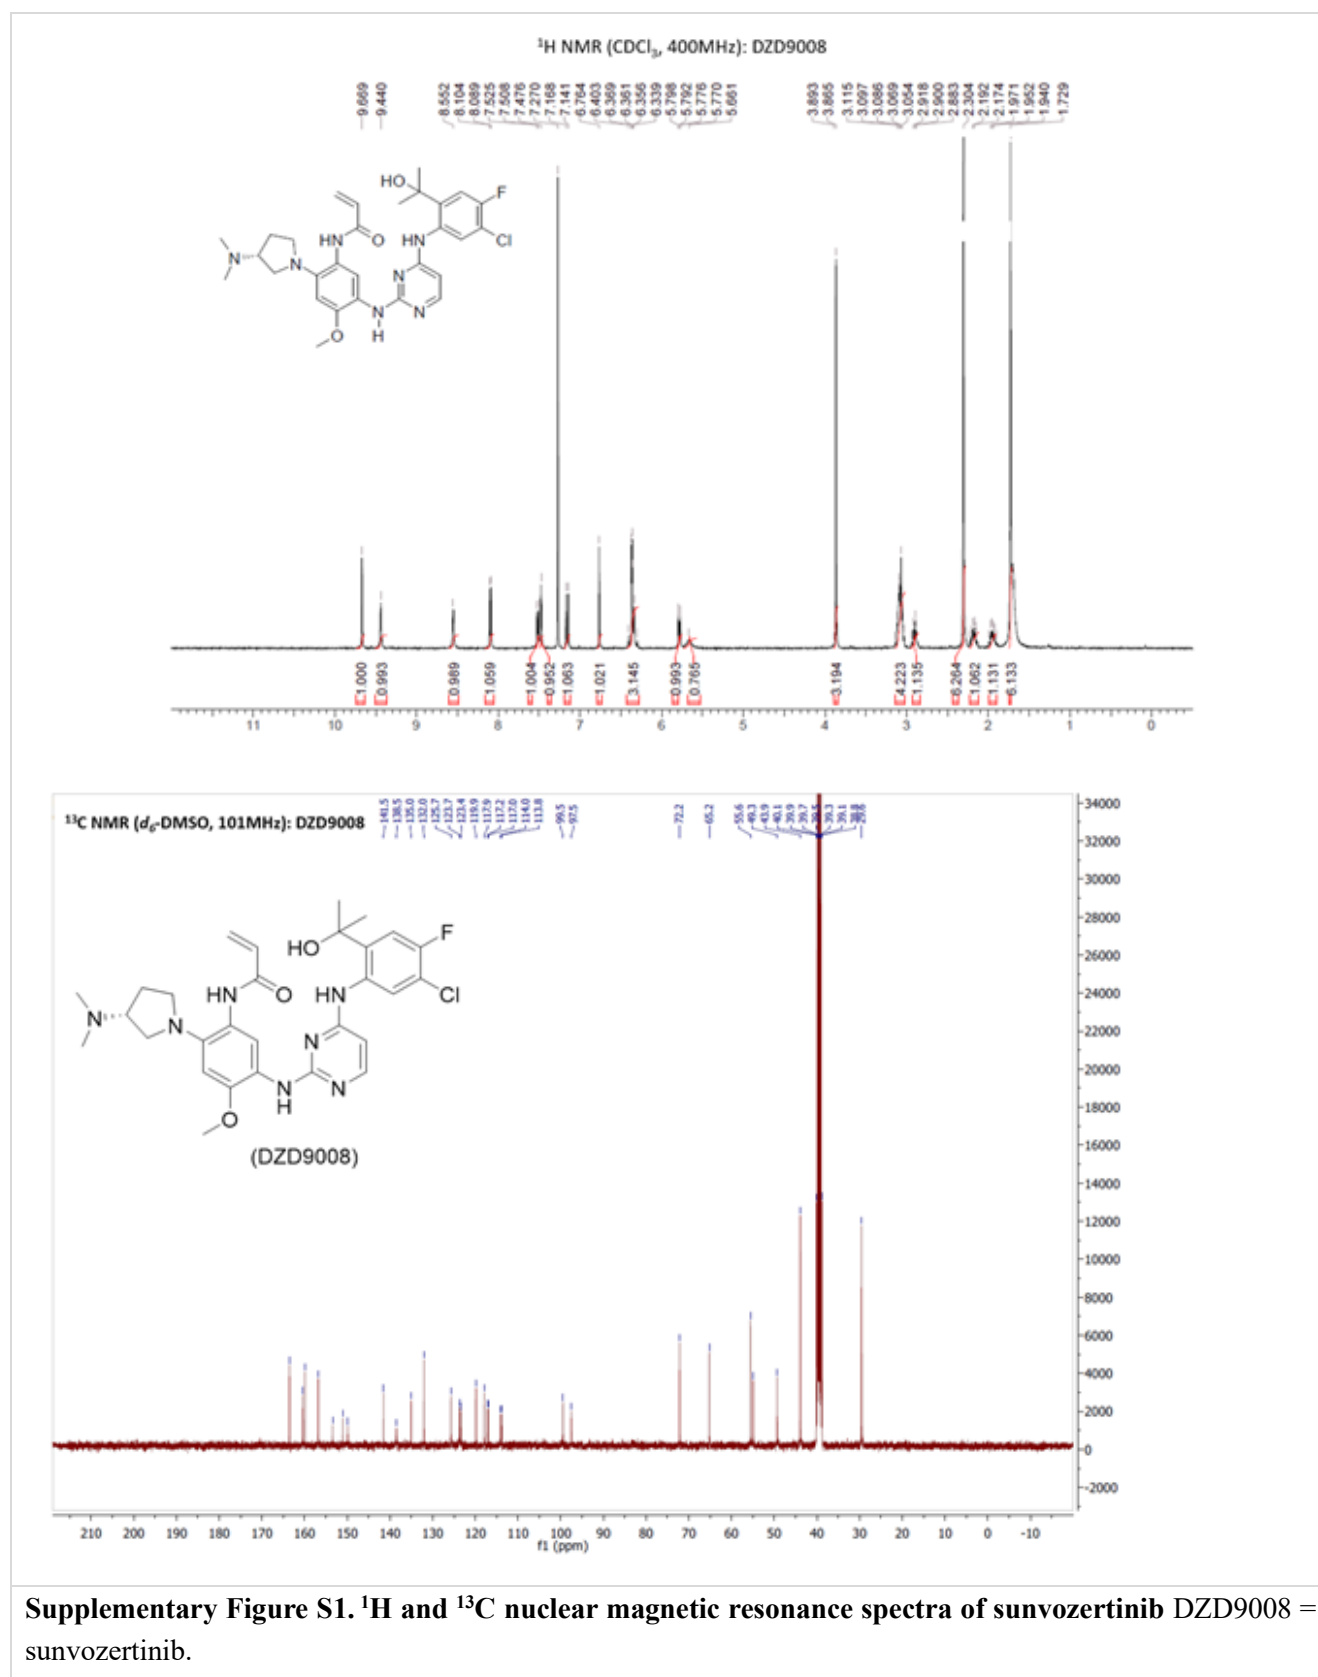

Supplementary Figure S1. <sup>1</sup>H and <sup>13</sup>C nuclear magnetic resonance spectra of sunvozertinib DZD9008 = sunvozertinib.

**A**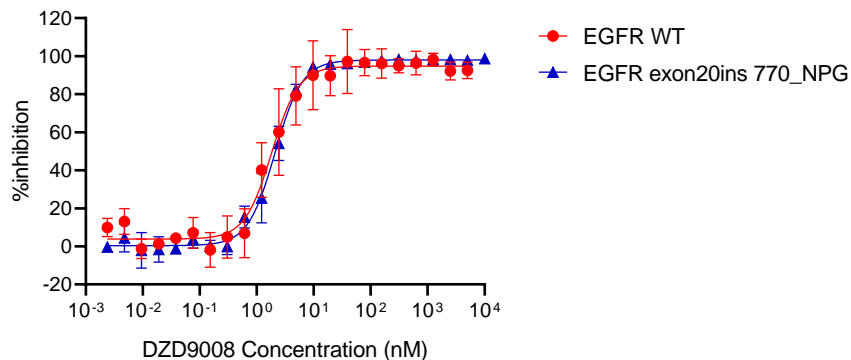**B**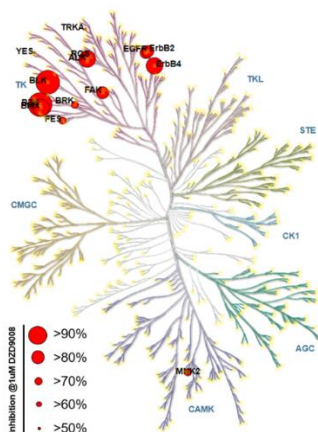**C**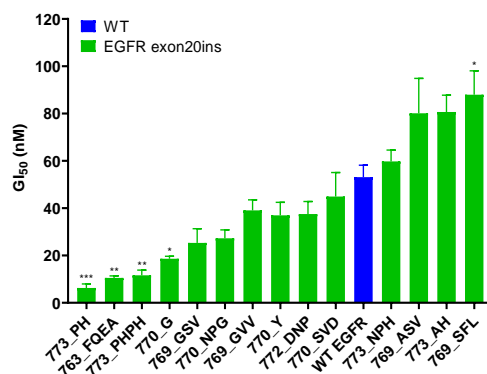

**Supplementary Figure S2. Enzymatic activity and anti-proliferation activity of sunvozertinib. A.**

Enzymatic activity of sunvozertinib on EGFR Exon20ins 770\_NPG and wild type. The compound was pre-incubated with recombinant kinases at room temperature for 30 minutes, then the reaction was initiated by adding 2 mM ATP and substrate peptide which could be phosphorylated by kinases in the reaction. After 30 minutes incubation, the reaction was stopped by adding detection reagent mix containing EDTA. **B.** The kinases with > 50% inhibition by 1 μM sunvozertinib at Km ATP were plotted on the human kinome tree (www.kinohub.org). Circle size is proportional to percentage inhibition. **C.** Anti-proliferation activity GI<sub>50</sub> of sunvozertinib in Ba/F3 cell lines carrying different EGFR exon20ins or A431 carrying wild-type EGFR. Cells were treated with sunvozertinib at a series of concentrations for 72 hours, and then cell viability was analyzed using the CellTiter-Glo viability assay. Three independent experiments were performed. Data were presented as mean±standard error of the mean. One-way ANOVA test was used for comparison with wild-type EGFR. \*P<0.05, \*\*P<0.01, \*\*\*P<0.001. DZD9008 = sunvozertinib.

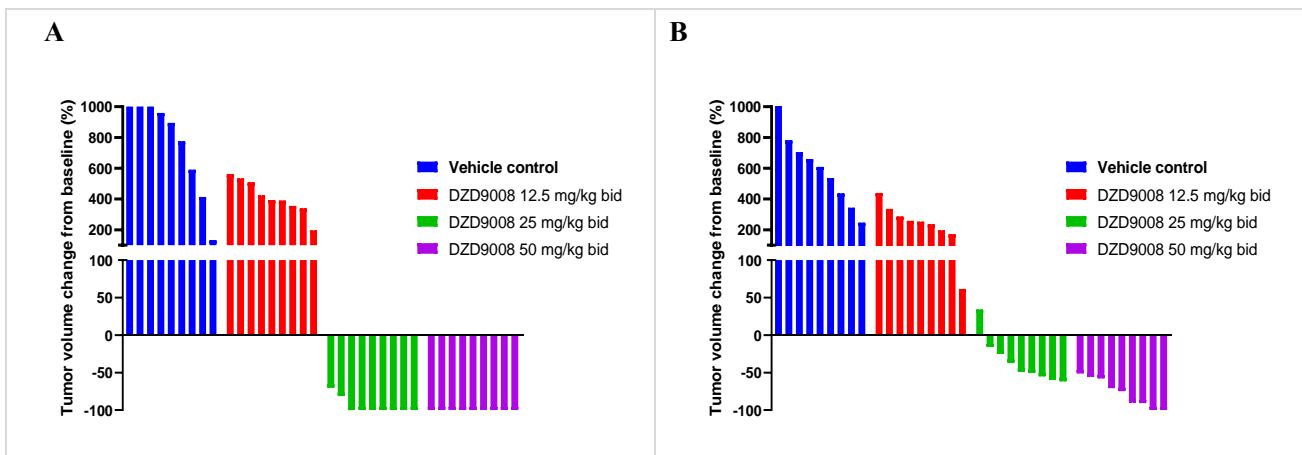

**Supplementary Figure S3. Waterfall plots of *in vivo* antitumor activity of sunvozertinib in EGFR exon20ins xenograft models. A.** Antitumor activity of sunvozertinib in PDX model LU0387 carrying EGFR exon20ins 773\_NPH. **B.** Antitumor activity of sunvozertinib in A431 xenograft model expressing wild-type EGFR. DZD9008 = sunvozertinib. Bid: twice daily. The tumor volume change shown here were the volume change at the end of treatment in Figure 2.

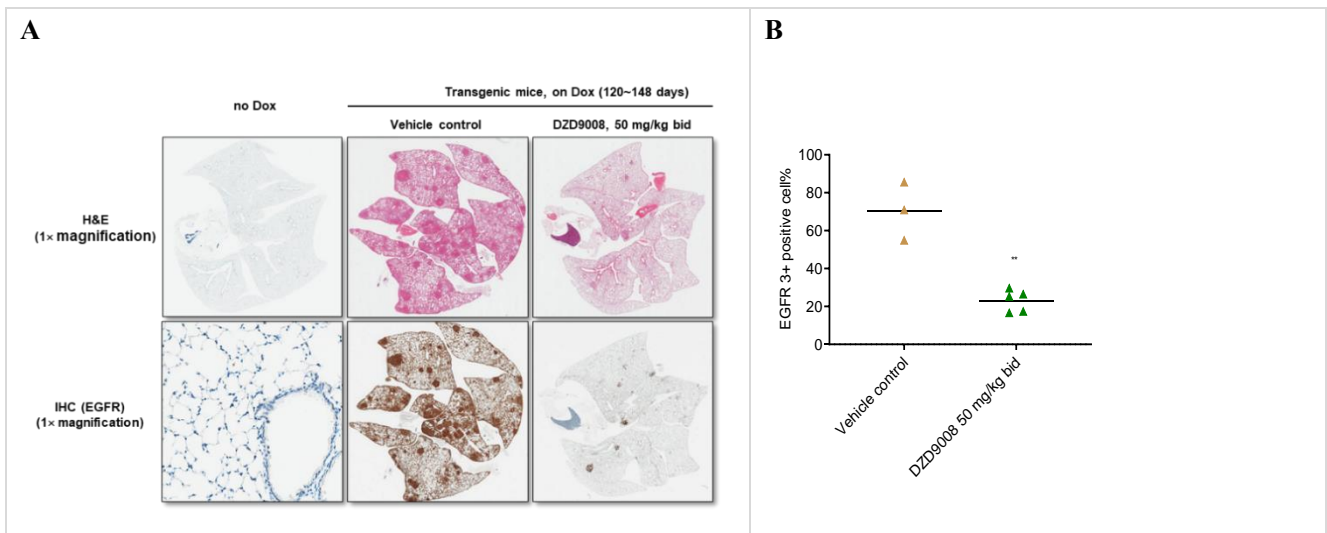

**Supplementary Figure S4. Sunvozertinib induced profound tumor growth inhibition in transgenic mice tumor models expressing EGFR exon20ins 769\_ASV. A.** Representative H&E (hematoxylin and eosin) and EGFR IHC (immunohistochemistry) staining of lung samples collected from EGFR exon20ins 769\_ASV mice after induction by doxycycline at 2 mg/ml for the 120 to 148 days. Then mice were treated with sunvozertinib at 50 mg/kg or vehicle for 30 days (n = 3 to 5 mice per group). **B.** Dot plots of tumor burden before and after 30 days of treatment in EGFR exon20ins 769\_ASV transgenic tumor model. The EGFR positivity was used to reflect the tumor burden. Each dot represented one mouse. P value was determined by student t-test using GraphPad Prism. \*\*P < 0.01. DZD9008 = sunvozertinib.

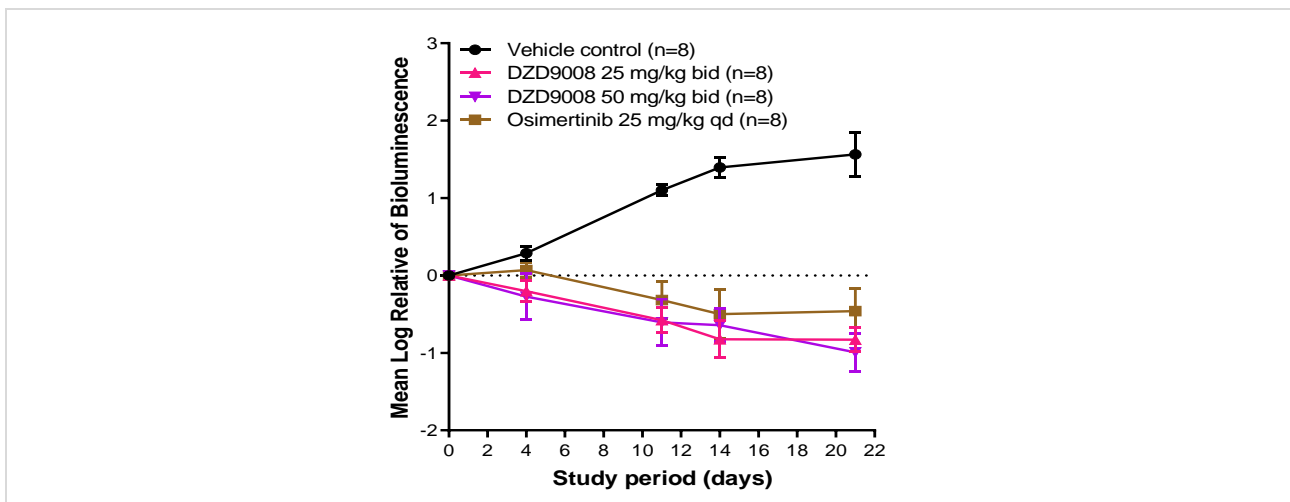

**Supplementary Figure S5. Antitumor activity of sunvozertinib in brain metastasis (BM) xenograft model.** The BM model was established by intracranial injection of luci-H1975 cell clone expressing EGFR T790M mutation. BM: brain metastasis. bid: twice daily. qd: once daily. DZD9008 = sunvozertinib.

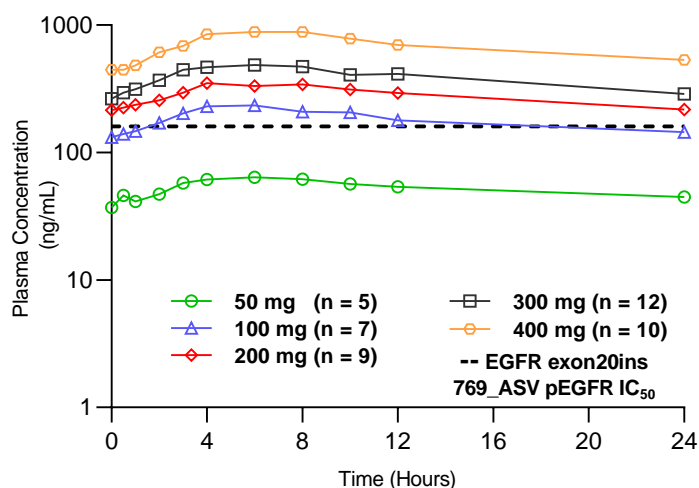

**Supplementary Figure S6. Sunvozertinib geometric mean plasma concentration over time after multiple-dose administration at cycle 2 day 1.** Pooled analysis of WU-KONG1 and WU-KONG2 studies. Data cut-off date (WU-KONG1: 15 October 2020; WU-KONG2: 9 September 2020). Blank dash line represents the back-converted plasma concentration of sunvozertinib of which free fraction equals to pEGFR IC<sub>50</sub> of one of the most prevalent EGFR exon20ins subtypes 769\_ASV.
